# Supplementary material for: Thermo-responsive polymer-modified metal–organic frameworks as soft–rigid enzyme-reactors for enhancement of enzymolysis efficiency using a controllable embedding protocol
Source: Royal Society of Chemistry journal article supplement (doi:10.1039/d3tb00844d), 2023-01-01
Supplement: d3tb00844d1.pdf [file d3tb00844d1.pdf]

# Supporting Information

## Thermo-responsive polymer-modified metal-organic frameworks as soft-rigid enzyme-reactors for enhancement of enzymolysis efficiency using a controllable embedding protocol

Juan Qiao<sup>a,b</sup>, Cheng Cheng<sup>a,c</sup>, Dan Li<sup>d</sup>, Li Qi\*<sup>a,b</sup>

- <sup>a</sup> Beijing National Laboratory for Molecular Sciences; Key Laboratory of Analytical Chemistry for Living Biosystems, Institute of Chemistry, Chinese Academy of Sciences, Beijing 100190 (P.R. China)
- <sup>b</sup> School of Chemical Sciences, University of Chinese Academy of Sciences, Beijing 100049 (P. R. China)
- <sup>c</sup> College of Chemistry & Environmental Science, Hebei University, Baoding 071002 (P. R. China)
- <sup>d</sup> College of Chemistry and Material Science, Jinan University, Guangzhou 510632 (P. R. China)

\* Correspondence: [qili@iccas.ac.cn](mailto:qili@iccas.ac.cn)

### Contents

1. Supporting Figures (Fig. S1-S15) and Table S1-S4.

## Experimental section

### Chemicals

*N*-isopropyl acrylamide (NIPAM), glucose oxidase (GOx), *N*-benzoyl-L-arginine-ethyl ester (BAEE) *N*-benzoyl-L-arginine (BA) and 2, 2'-azino-bis(3-ethylbenzothiazoline-6-sulfonic acid) (ABTS) were supplied by Aladdin Biochemical Technology Co., Ltd. (Shanghai, China). Dimethylvinylloxazolinone (VDMA) was gotten from Beijing Institute of Cool Light Fine Chemicals (Beijing, China). UIO-66-NH<sub>2</sub> was bought from Beijing Krre Technology Co., Ltd. (Beijing, China). 1,4-Dioxane, ethyl ether and *N,N*-dimethylformamide (DMF) were obtained from Concord Technology Co., Ltd. (Tianjin, China). Horseradish peroxidase (HRP) was supplied from Tokyo Chemical Industry Co., Ltd. (Tokyo, Japan). Trypsin (TRY) and D-glucose were purchased from Xinjingke Biotechnologies Co., Ltd. (Beijing, China). Glutaminase (Glnase) was brought from MegazymeLtd. D,L-Glutamine (D,L-Gln), D,L-glutamic acid (D,L-Glu) and dansyl chloride (Dns-Cl) were purchased from TCI Chemical Industrial Development Co., Ltd (Shanghai, China). Hydrogen peroxide (H<sub>2</sub>O<sub>2</sub>, 30.0% w/w), 3,3',5,5'-tetramethylbenzidine (TMB) and azobisisobutyronitrile (AIBN) were supplied from Beijing Innochem Technology Co., Ltd. (Beijing, China). Cytochrome c (Cyt-c) and fluorescein isothiocyanate isomer (FITC) were bought from Sigma-Aldrich (USA). Acetic acid (HAc) and sodium hydroxide (NaOH) were provided by Beijing Chemical Works (Beijing, China). Tris-(hydroxymethyl)-aminomethane (Tris) was gotten from J&K Scientific Ltd. (Beijing, China). Phosphate buffered saline (PBS) was purchased from ThermoFisher Biochemical Products Co., Ltd. (Beijing, China). Dipeptide L-arginine-L-arginine (L-Arg-L-Arg) was obtained from Nanjing Peptide Biotechnology Co. Ltd. (Nanjing, China). Brilliant Blue G (G-250) was obtained from Alfa Aesar Chemicals Co., Ltd. (Shanghai, China). Phosphoric acid (H<sub>3</sub>PO<sub>4</sub>), sodium acetate (NaAc) and other chemicals were supplied by Beijing Yili Fine Chemicals Co., Ltd. (Beijing, China). The aqueous solutions were prepared with Milli-Q water (Millipore, Bedford, MA, USA).

### Apparatus

The ultraviolet-visible (UV-*vis*) absorption spectra were recorded using a TU-1900 UV-*vis* double-beam spectrometer (Purkinje General, China). The dynamic light scattering (DLS) measurements were carried out with a Zetasizer laser particle analyser (Zetasizer Nano ZS ZEN3600, British). Transmission electron microscopy (TEM) images were obtained using a transmission electron microscope (JEM-2010, Japan electron optics laboratory, Japan) at a voltage of 200 kV. Circular dichroism (CD) spectra were recorded on a Circular dichroism spectrometer (J-1700, JASCO, Japan). The <sup>1</sup>H nuclear magnetic resonance spectroscopy (<sup>1</sup>H NMR) spectra were recorded on a Bruker Avance III 400 spectrometer (Bruker Corporation, Billerica, MA, USA) using deuterium DMSO as the solvent at room temperature. Confocal Laser Scanning Microscopy (FV1000-IX81, Olympus, Japan) was used to determine the presence of FITC labeled enzymes@MOFVN. Thermogravimetric analyses (TGA) were performed in air with temperature increasing at 10 °C min<sup>-1</sup> and a temperature range from 40 °C to 930 °C using a synchronous thermal analyzer (STA 449 F3 Jupiter, Nestal, Germany). The samples were dried in vacuum at 50 °C for 12 h before TGA analysis. Powder X-ray diffraction (PXRD) patterns were collected on a PANalytical Empyrean diffractometer (Empyrean, PANalytical B.V., Netherlands) at room temperature

### Enzymatic activities of GOx@MOFVN

The enzymatic activity of GOx@MOFVN at 25 °C and 37 °C were evaluated through tracing the production of H<sub>2</sub>O<sub>2</sub> (Equation 1) based on 3,3',5,5'-tetramethylbenzidine (TMB)-H<sub>2</sub>O<sub>2</sub>-HRP (Equation 2) enzymatic assay.

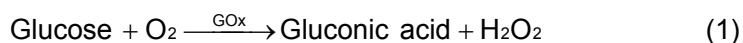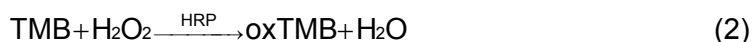

20.0 μL as-prepared GOx@MOFVN was dispersed into 0.5 mL HAc-NaAc buffer (pH 5.5, 50 mM), followed by adding a series concentration of D-glucose (0.5 mL) solution. The mixture was incubated for 20.0 min at 25 °C. And then, the mixture was added to 1.0 mL HAc-NaAc buffer (pH 5.5, 50 mM) which contained 0.2 μg/mL HRP and 0.2 mM TMB. The reaction solution was incubated at room temperature for 5.0 min. After incubation, 200.0 μL H<sub>2</sub>SO<sub>4</sub> (2.0 M) was added to the reaction solution to terminate reaction. The TMB was oxidized to oxTMB by produced H<sub>2</sub>O<sub>2</sub> quantitatively, which was measured at 450 nm by UV-vis spectrophotometer. For the enzymatic activity of GOx@MOFVN at 37 °C, 25 °C was replaced by 37 °C, other steps were same as the above operation processes.

### Enzymatic activities of HRP@MOFVN

The enzymatic activity of HRP@MOFVN at 25 °C and 37 °C were evaluated through tracing the production of oxTMB using TMB as a peroxidase substrate (Equation 3).

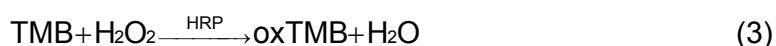

60.0 μL as-prepared HRP@MOFVN was dispersed into 1.0 mL HAc-NaAc buffer (pH 5.5, 50 mM) containing 0.2 mM H<sub>2</sub>O<sub>2</sub>, followed by adding a series concentration of TMB (1.0 mL) solution. The mixture was incubated for 20.0 s at 25 °C. After reaction, 200.0 μL H<sub>2</sub>SO<sub>4</sub> (2.0 M) was added to the solution to terminate reaction. The produced oxTMB was measured at 450 nm by UV-vis spectrophotometer. For the enzymatic activity of HRP@MOFVN at 37 °C, 25 °C was replaced by 37 °C, other steps were same as the above operation processes.

### Enzymatic activities of TRY@MOFVN

The enzymatic activity of TRY@MOFVN at 25 °C and 37 °C were evaluated through tracing the production of *N*-benzoyl-L-arginine (BA) using *N*-benzoyl-L-arginine-ethyl ester (BAEE) as a substrate (Equation 4).

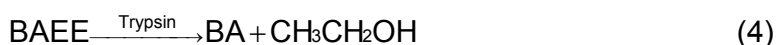

50.0 μL as-prepared TRY@MOFVN was dispersed into 0.5 mL Tris-HCl (pH 8.0, 50.0 mM), followed by adding a series concentration of substrate BAEE (0.5 mL) solution. The mixture was incubated for 10.0 min at 37 °C. The enzymatic kinetics activity of TRY@MOFVN at 37 °C was determined by measuring the amount of product BA with capillary electrophoresis (CE) technique and quantitatively analyzed by a standard calibration curve. The enzymatic activity of TRY@MOFVN at 25 °C was tested using the same steps as the above operation processes.

CE performance conditions: A capillary with 75.0 μm inner diameter and 60.0 cm length (45.0 cm effective length, Yongnian Optical Fiber Factory, Hebei, China) was used for CE performance. Buffer solution: 50.0 mM Tris-HCl, pH 8.0; applied voltage, +20.0 KV; sampling, siphoning for 20 s in 15.0 cm height; UV detection at 254 nm.

## Enzymatic activities of Cyt-c@MOFVN

The enzymatic activity of Cyt-c@MOFVN at 25 °C and 37 °C were evaluated through tracing the production of oxABTS using 2, 2'-azino-bis(3-ethylbenzothiazoline-6-sulfonic acid) (ABTS) as a substrate (Equation 5).

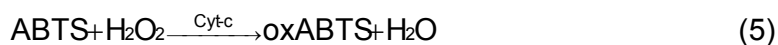

50.0  $\mu\text{L}$  as-prepared Cyt-c@MOFVN was dispersed into 2.0 mL PBS (pH 7.2, 6.7 mM) which contained 10.0 mM  $\text{H}_2\text{O}_2$ , followed by adding a series concentration of substrate ABTS (1.0 mL) solution. The mixture was incubated for 5.0 min at 25 °C. The product oxABTS was measured by UV-vis spectrophotometer at 420 nm. The enzymatic activity of Cyt-c@MOFVN at 37 °C was tested using the same steps as the above operation processes.

## Enzymatic activities of Glnase@MOFVN

The enzymatic activity of Glnase@MOFVN at 25 °C and 37 °C were evaluated through tracing the decrease of L-Gln using D,L-glutamine (D,L-Gln) as a substrate (Equation 6).

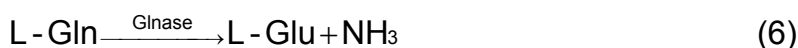

30.0  $\mu\text{L}$  as-prepared Glnase@MOFVN was dispersed into 30.0  $\mu\text{L}$  50.0 mM HAc-NaAc (pH 4.9), followed by adding a series concentration of substrate L-Gln (60.0  $\mu\text{L}$ ) solution. The mixture was incubated for 10.0 min at 25 °C. The substrate L-Gln was measured by CE technique and quantitatively analyzed by a standard calibration curve. Before CE analysis, the obtained supernatant was boiled for 20.0 min and derivatized with dansyl chloride (Dns-Cl). The enzymatic activity of Glnase@MOFVN at 37 °C was tested using the same steps as the above operation processes.

CE performance conditions for chiral separation of Dns-D,L-Gln and enzymatic kinetics study: A capillary with 75.0  $\mu\text{m}$  inner diameter and 60.0 cm length (45.0 cm effective length, Yongnian Optical Fiber Factory, Hebei, China) was used for CE performance. Buffer solution: 100.0 mM boracic acid, 10.0 mM ammonium acetate, 3.0 mM zinc acetate and 6.0 mM L-Arg-L-Arg, pH 8.0; applied voltage, -18.0 KV; sampling, siphoning for 10 s in 15.0 cm height; UV detection at 254 nm.

## Calibration of BA

The BA in the enzymatic activities test for TRY@MOFVN was quantified based on the standard calibration curve. The corresponding calibration curve of the assay was described as follow. Briefly, a series concentration of BA solution in PBS was prepared. The determination of BA was performed by CE technique. The concentration of BA was proportion to its peak area and the standard calibration curve was obtained.

## Calibration of Dns-L-Gln

The substrate L-Gln in the enzymatic activities test for Glnase@MOFVN was quantified based on the standard calibration curve. The corresponding calibration curve of the assay was described as follow. Briefly, a series of L-Gln solutions were prepared and derived with Dns-Cl for CE analysis. The determination of Dns-L-Gln was performed by CE technique. The concentration of Dns-L-Gln was proportion to its peak area and the standard calibration curve was obtained.

## Enzymatic kinetic study

Enzymatic kinetic parameters can be calculated based on the Michaelis-Menten equation (Equation 7):

$$V_0 = V_{\max} (S) / (K_m + (S)) \quad (7)$$

Where,  $V_0$  is the initial catalytic rate;  $V_{\max}$  is the maximum rate.  $[S]$  is the initial substrate concentration, and  $K_m$  is the Michaelis-Menten constant. The initial catalytic rates  $V_0$  is determined by making the slope of the kinetic curve in the initial phase, and the initial substrate concentration  $[S]$  is determined at  $t = 0$  s. The kinetic parameters  $K_m$  and  $V_{\max}$  are fitted using Michaelis-Menten equation with the calculated  $V_0$  and  $[S]$ .

## Measurement of the enzyme-loading amount

The loading amount of the enzymes within MOFVN was measured by examining the concentration decrease of enzymes in the supernatant before and after immobilization *via* Bradford proteins assay. Typically, 0.5 mL enzyme solution was added into a tube with 1.5 mL deionized water, followed by introducing 1.0 mL Coomassie Brilliant Blue G-250 reagent. After 10.0 min incubation, the solution was collected and detected by a UV-*vis* spectrophotometer. The concentration of the enzymes was proportional to its UV-*vis* absorption intensity at 595 nm.

The enzymes (GOx, HRP, TRY, Cyt-c, Glnase) loading amount was quantified based on the standard calibration curve. The corresponding calibration curve of the assay was described as follow. Briefly, a series of enzymes (GOx, HRP, TRY, Cyt-c, Glnase) solutions were prepared in PBS. Then, 0.5 mL enzyme solution was added into a tube with 1.5 mL deionized water, followed by introducing 1.0 mL Coomassie Brilliant Blue G-250 reagent. After 10.0 min incubation, the solution was collected and detected by a UV-*vis* spectrophotometer. The concentrations of enzymes were proportion to the UV-*vis* absorption intensity at 595 nm and the standard calibration curve was obtained.

## D-glucose detection in rat serum

Three male-Sprague-Dawley-rats (about 250.0 g) were gotten from Beijing Vital River Laboratory Animal Technology Co. Ltd. (Beijing, China). The rat serum samples were pre-treated to eliminate the interferences-proteins. Simply, 0.1 mL of the fresh rat serum samples was diluted by 0.1 mL of ethanol, which was incubated at 25 °C for 10.0 min. Consequently, the samples were centrifuged at 10,000 rpm for 10.0 min and the supernatant was collected and stored at 4 °C for further analysis. All experiments using rat samples were performed in accordance with the institutional animal care and used the guidelines of China (GB/T 27416-2014).

The proposed colorimetric GOx@MOFVN-HRP-TMB system was applied to determination of D-glucose concentration in the rat serum samples. 30.0  $\mu$ L rat serums, GOx@MOFVN (40.0  $\mu$ L), HRP (10.0  $\mu$ L, 1.0 mg/mL), TMB (40.0  $\mu$ L, 1.0 mM), and acetate buffer (2.88 mL, pH 5.5) were mixed. After the mixture was mixed and incubated at 37 °C for 15.0 min. Then, H<sub>2</sub>SO<sub>4</sub> (200.0  $\mu$ L, 2.0 M) was added into the reaction solution to stop reaction. Finally, the UV-*vis* absorption at 450 nm was conducted.

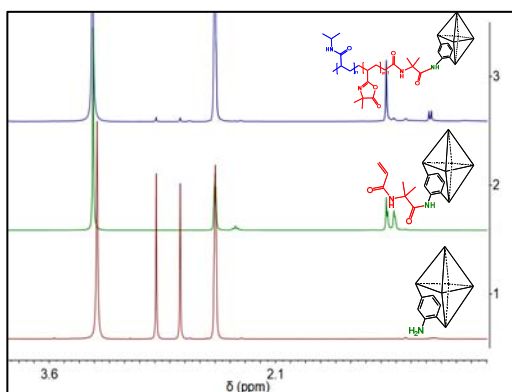

**Fig. S1.**  $^1\text{H}$  NMR spectra of MOF, MOFV, and MOFVN.

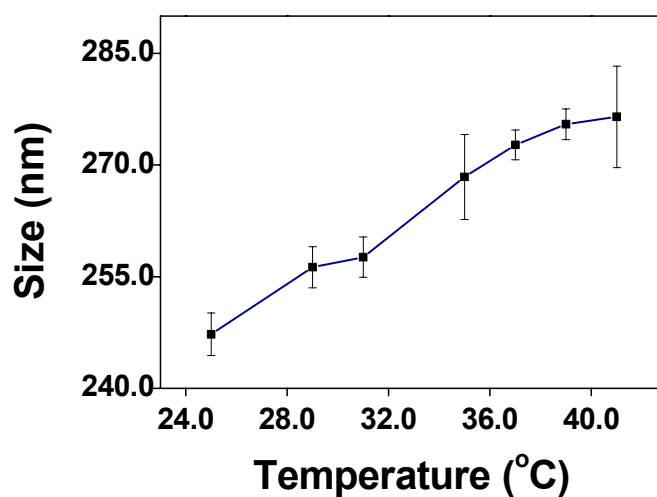

**Fig. S2.** Size of MOFVN nanoparticles changed with temperature increase.

**Table S1** Molecule weight of different enzymes

| Enzymes | Molecule weight (KD) |
|---------|----------------------|
| GOx     | 150.0                |
| Glnase  | 138.0                |
| HRP     | 43.0                 |
| TRY     | 23.0                 |
| Cyt-c   | 13.0                 |

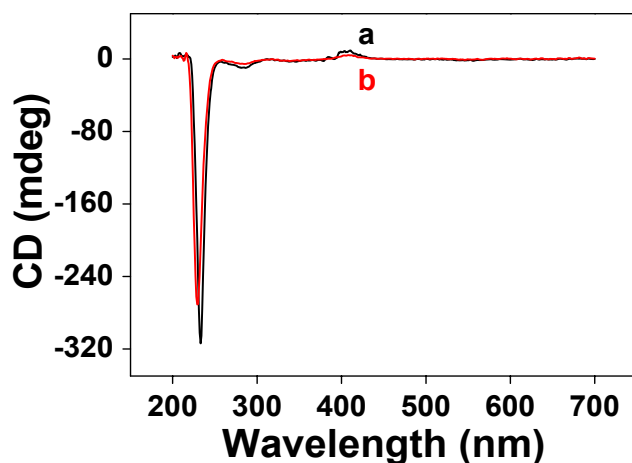

**Fig. S3.** CD spectra of (a) free HRP and (b) immobilized HRP.

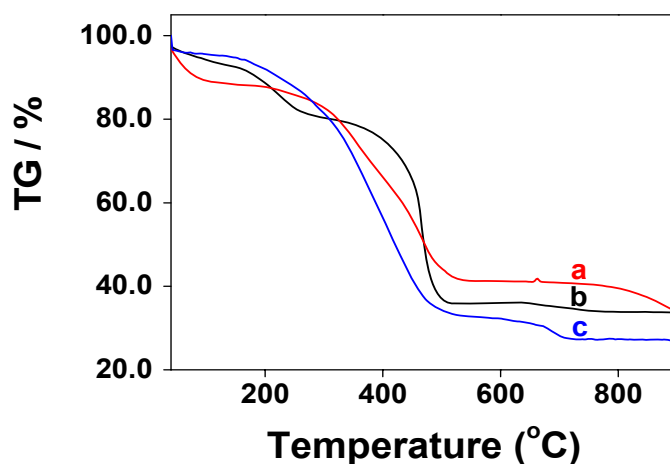

**Fig. S4.** Thermal gravity analysis of (a) MOF (b) MOFVN and (c) HRP@MOFVN.

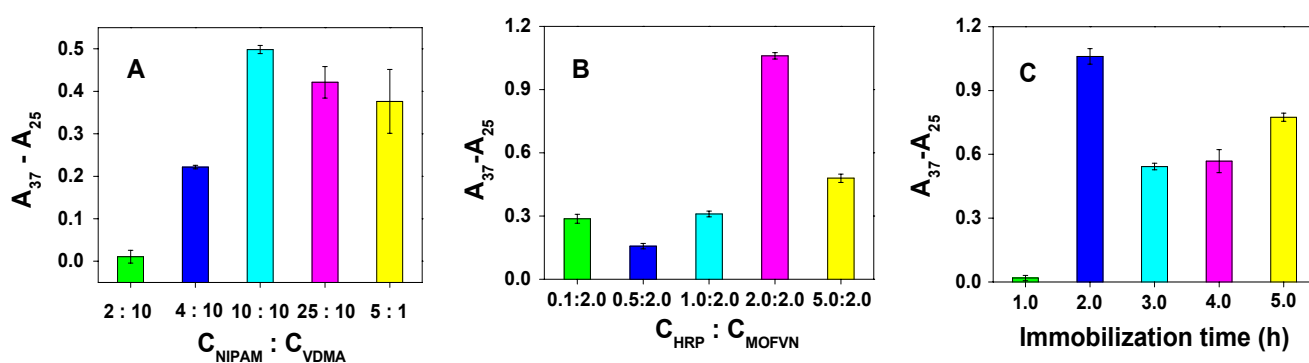

**Fig. S5.** Optimization of (A) concentration ratio of NIPAM to VDMA; (B) concentration ratio of HRP to MOFVN and (C) immobilization time.  $A_{25}$  and  $A_{37}$  referred to the UV-vis absorption of oxTMB at 450 nm in HRP@MOFVN-TMB- $\text{H}_2\text{O}_2$  system at 25 °C and 37 °C, respectively.

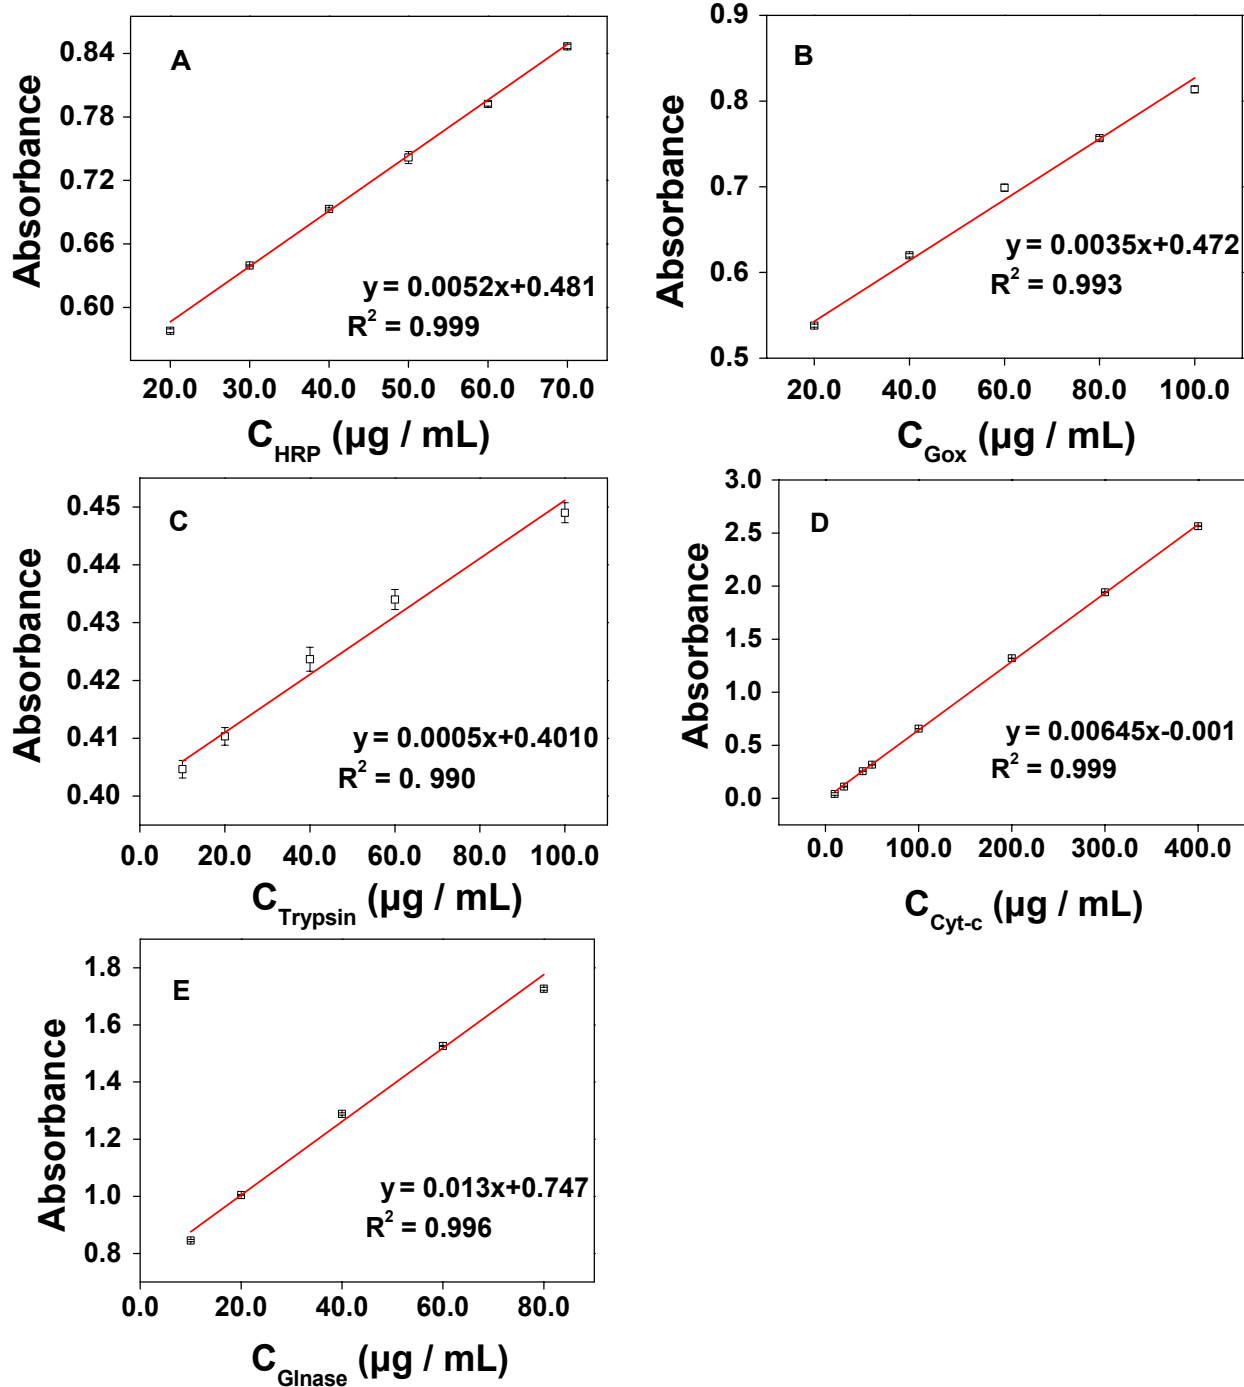

**Fig. S6.** Linear relationship of (A) HRP, (B) GOx, (C) TRY and (D) Cyt-c concentrations with their UV-vis intensities obtained by Coomassie bright blue assay.



**Table S2** The calculated enzyme loading amount in enzymes@MOFVN

| Enzymes@MOFVN                   | GOx@MOFVN | Glnase@MOFVN | HRP@MOFVN | TRY@MOFVN | Cyt-c@MOFVN |
|---------------------------------|-----------|--------------|-----------|-----------|-------------|
| Enzyme loading amount (µg / mg) | 41.0      | 43.5         | 45.9      | 63.3      | 148.5       |

**Table S3** Comparison of enzymes loading content in different nano-reactors

| Nano-reactors    | Immobilized enzymes | Loading content (wt %)* | Ref.             |
|------------------|---------------------|-------------------------|------------------|
| Cyt-c@ZIF-8      | Cyt-c               | 2.7                     | [1]              |
| HRP@ZIF-8        | HRP                 | 0.7                     | [1]              |
| CAT@ZIF-8        | CAT                 | 1.8                     | [1]              |
| UOx@ZIF-8        | UOx                 | 3.3                     | [1]              |
| ADH@ZIF-8        | ADH                 | 4.2                     | [1]              |
| HRP@MOFs         | HRP                 | 0.45                    | [2]              |
| Cyt-c@MOFs       | Cyt-c               | 1.3                     | [2]              |
| GOx@MOFs         | GOx                 | 4.2                     | [2]              |
| MB@ZIF-8         | MB                  | 18.2                    | [3]              |
| HRP@ZIF-8        | HRP                 | 14.4                    | [3]              |
| Cyt-c@ZIF-8      | Cyt-c               | 8.0                     | [4]              |
| CAT@ZIF-90       | CAT                 | 5.0                     | [5]              |
| OVA@ZIF-8        | OVA                 | 7.0                     | [6]              |
| Cyt-c@Tb-mesoMOF | Cyt-c               | 10.0                    | [7]              |
| Glnase@MOFVN     | Glnase              | 17.4                    |                  |
| HRP@MOFVN        | HRP                 | 18.4                    |                  |
| TRY@MOFVN        | TRY                 | 25.3                    | <b>This work</b> |
| Cyt-c@MOFVN      | Cyt-c               | 59.4                    |                  |
| GOx@MOFVN        | GOx                 | 16.4                    |                  |

\* Loading content (wt %) = loading amount in nano-reactors measured / total amount of enzymes used for immobilization x 100%.

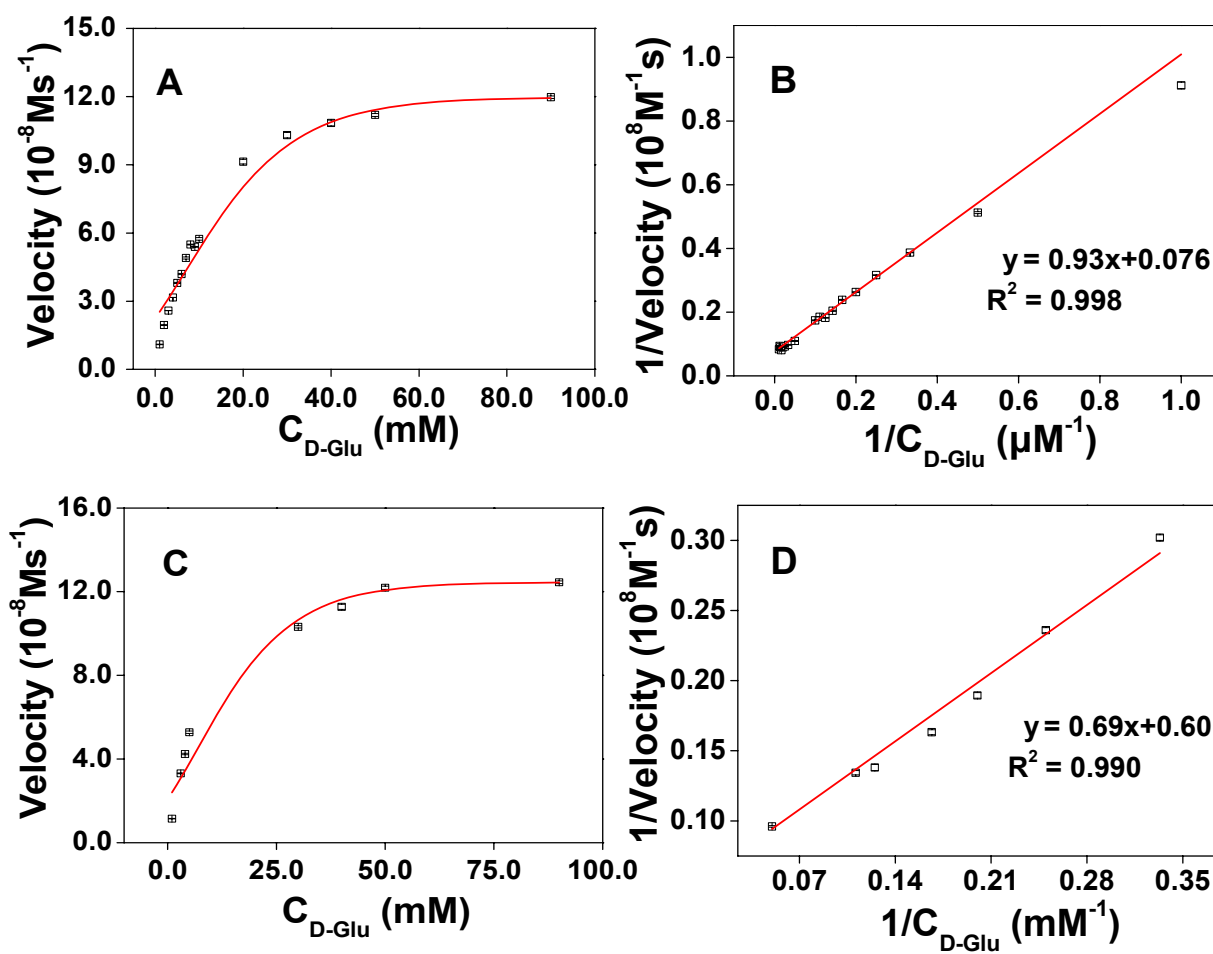

**Fig. S7.** Kinetic parameters of GOx@MOFVN using D-glucose (D-Glu) as the substrate at 25 °C (A, B) and 37 °C (C, D), respectively.

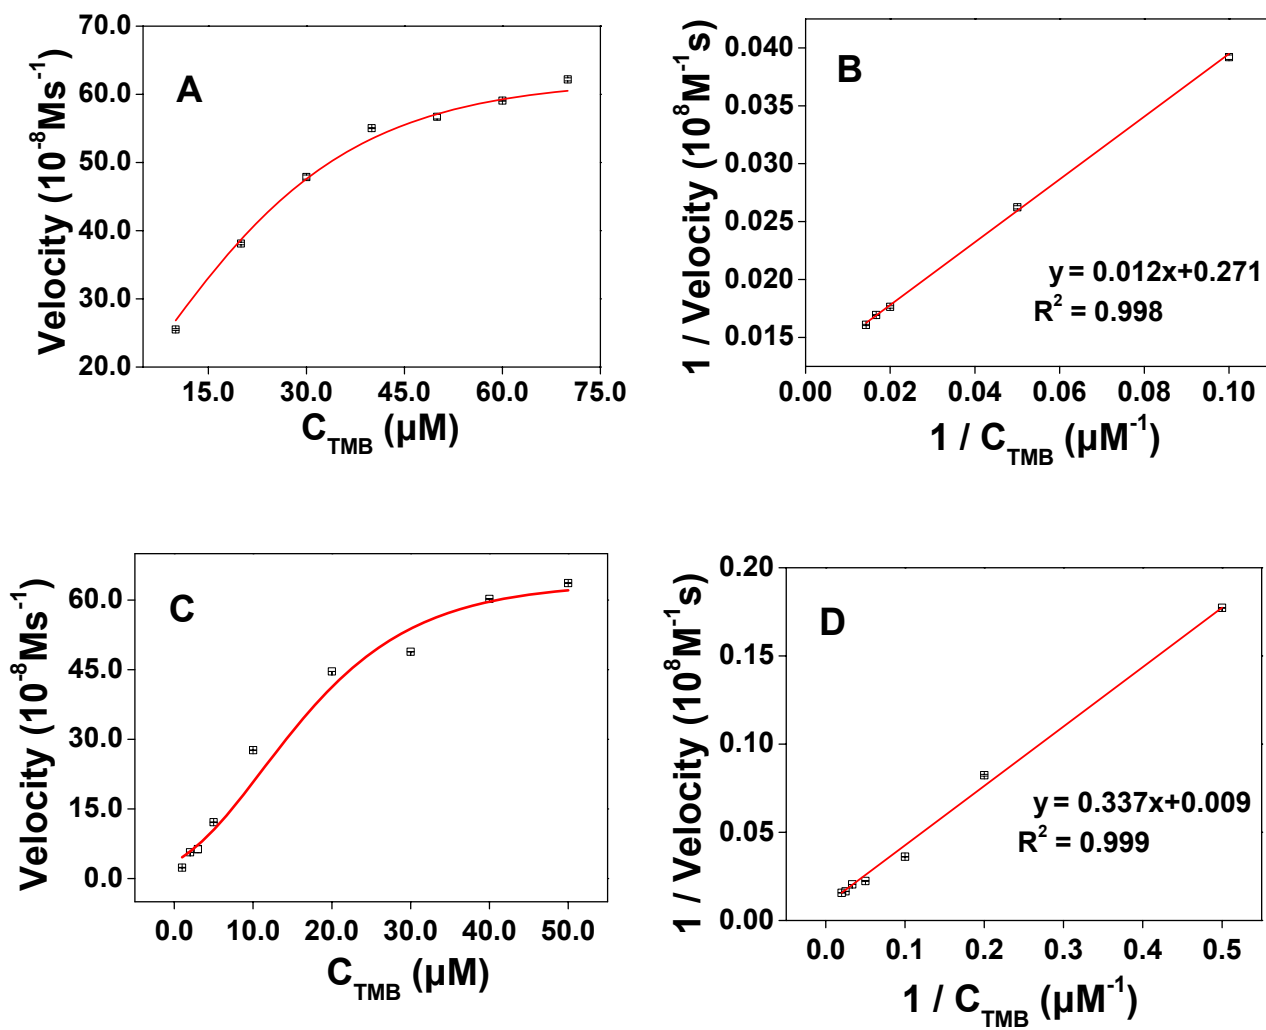

**Fig. S8.** Kinetic parameters of HRP@MOFVN with TMB as the substrate at 25 °C (A, B) and 37 °C (C, D), respectively.

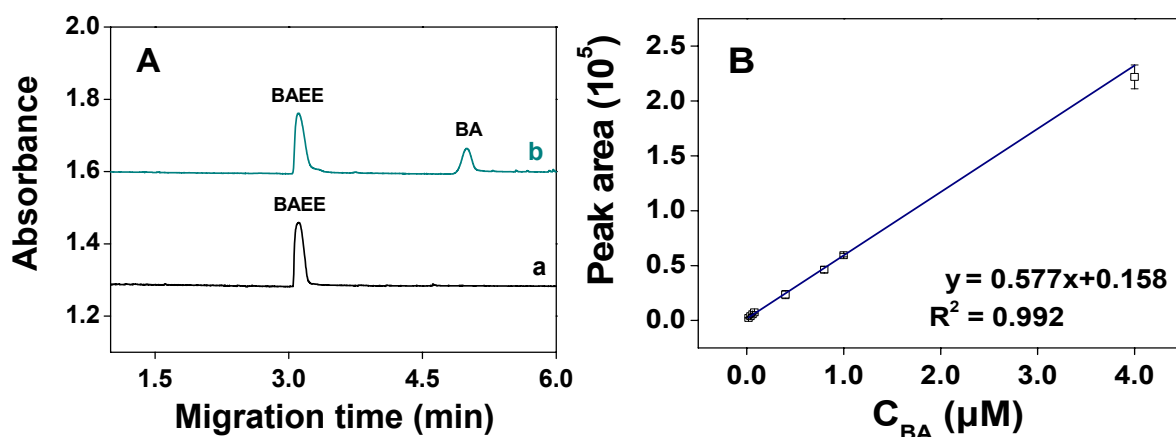

**Fig. S9.** (A) Electropherograms of BAEE (a) before and (b) after incubation with TRY@MOFVN. (B) Standard calibration curve of BA.

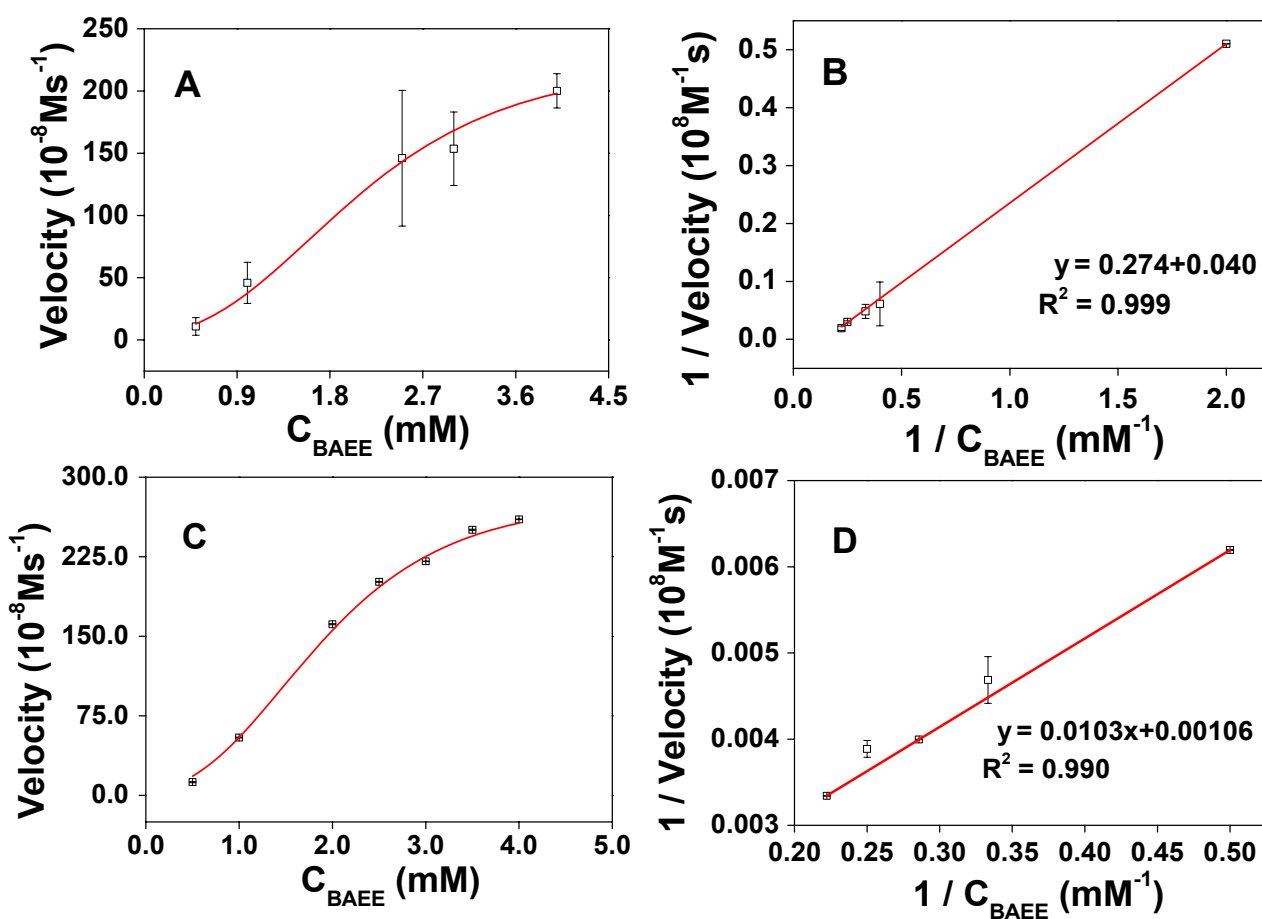

**Fig. S10.** Kinetic parameters of TRY@MOFVN with BAEE as substrate at 25 °C (A, B) and 37 °C (C, D), respectively.

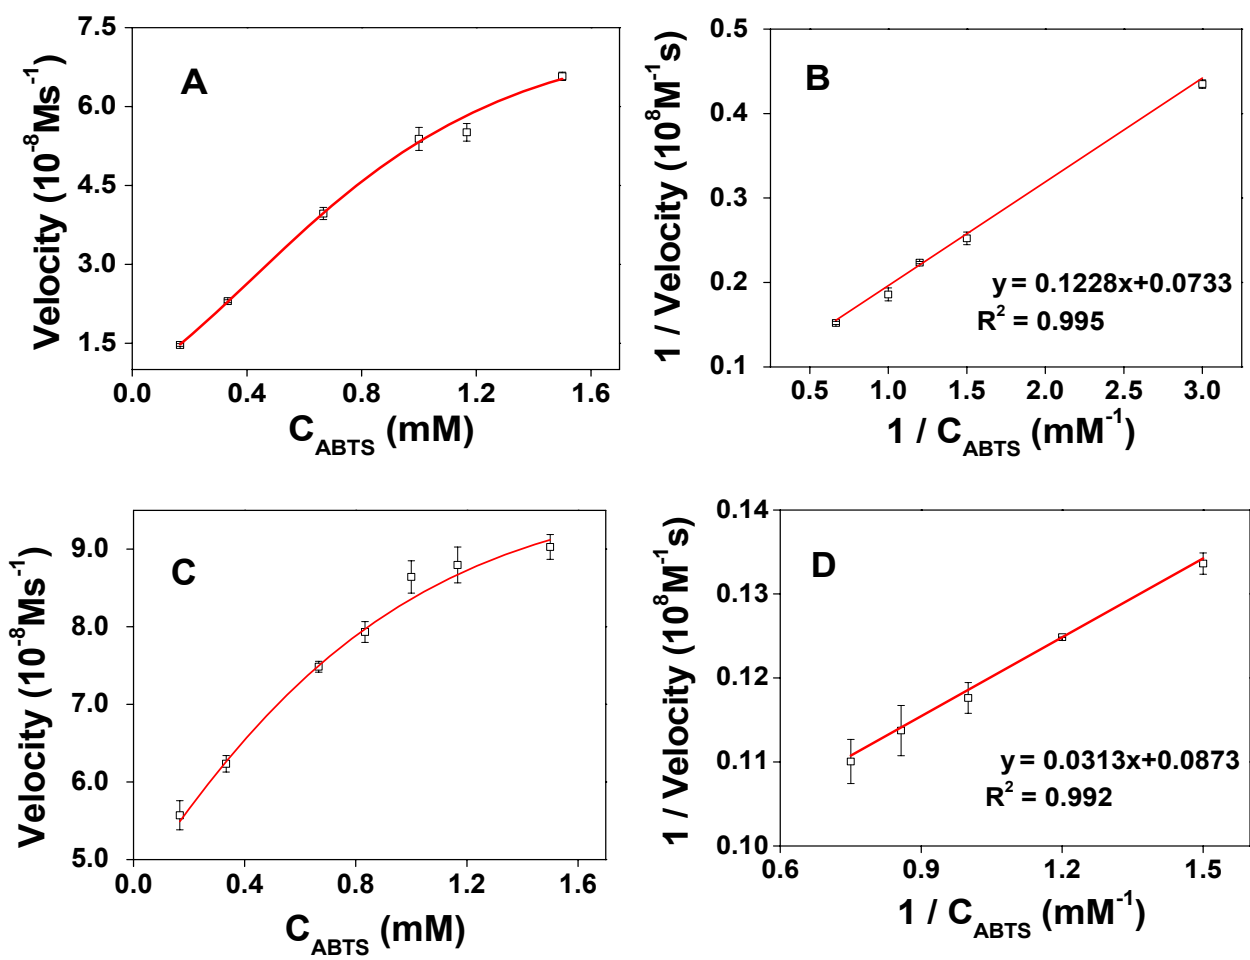

**Fig. S11.** Kinetic parameters of Cyt-c@MOFVN using ABTS as the substrate at 25 °C (A, B) and 37 °C (C, D), respectively.

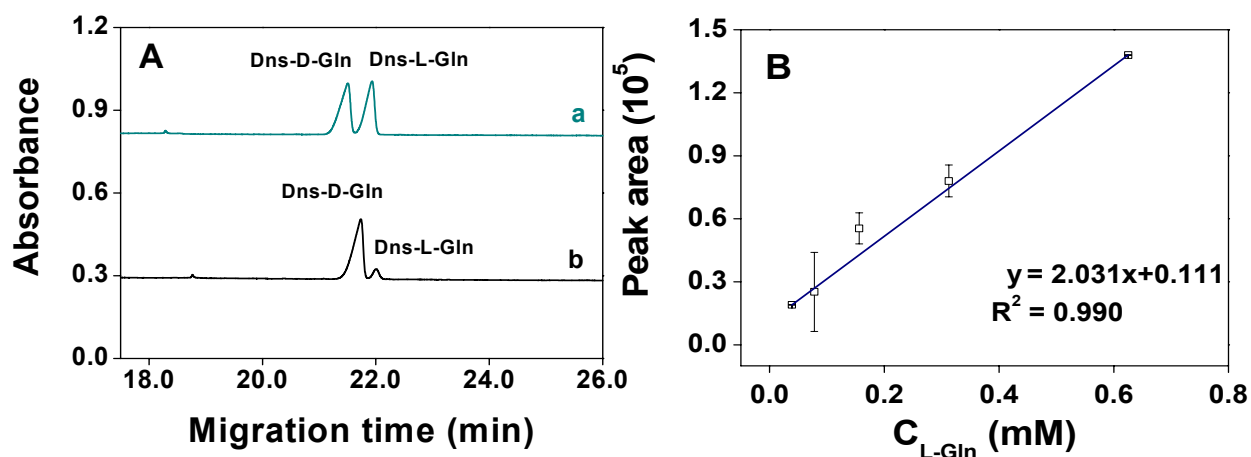

**Fig. S12.** (A) Electropherograms of D,L-Gln (a) before and (b) after incubation with Glnase@MOFVN. (B) Standard calibration curve of Dns-L-Gln.

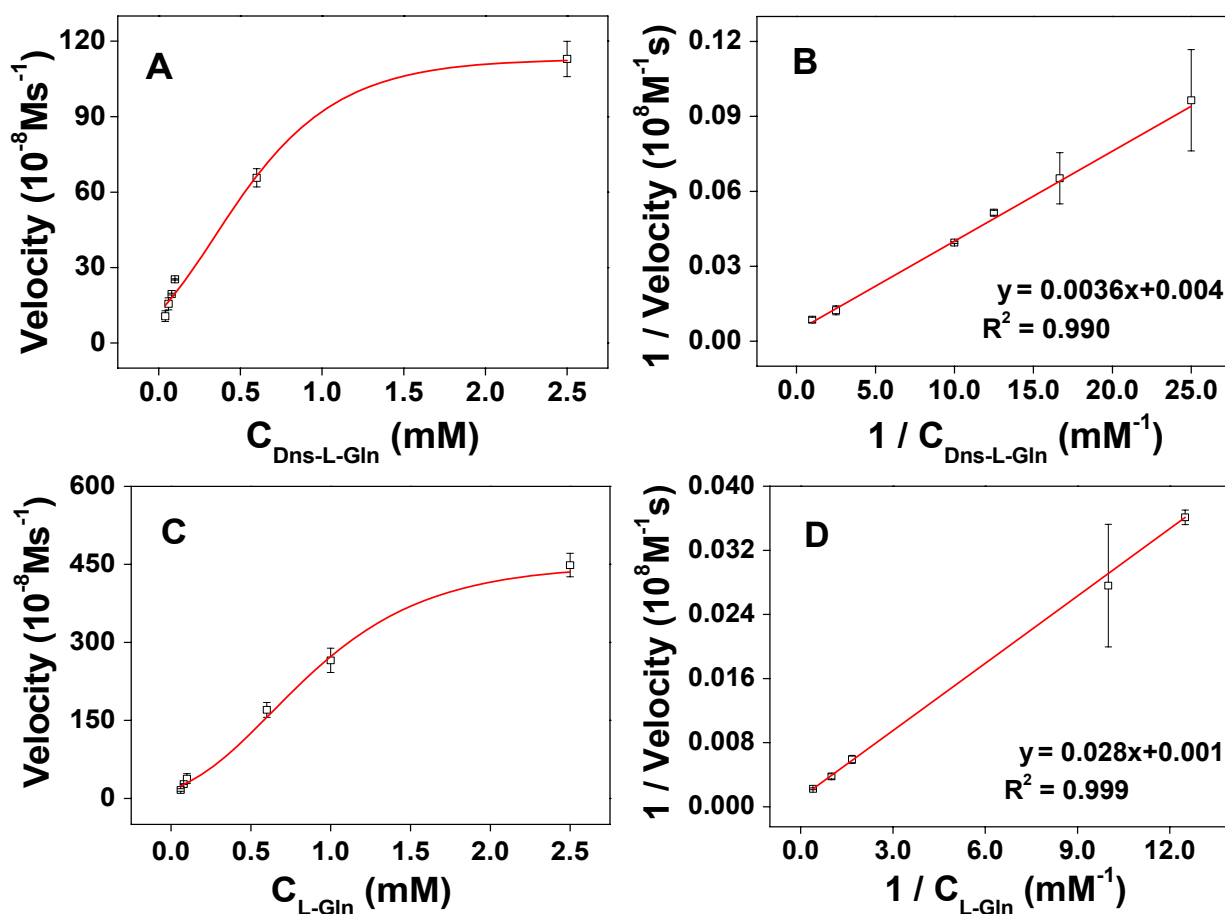

**Fig. S13.** Kinetic parameters of Glnase@MOFVN at 25 °C (A and B) and 37 °C (C and D), respectively.

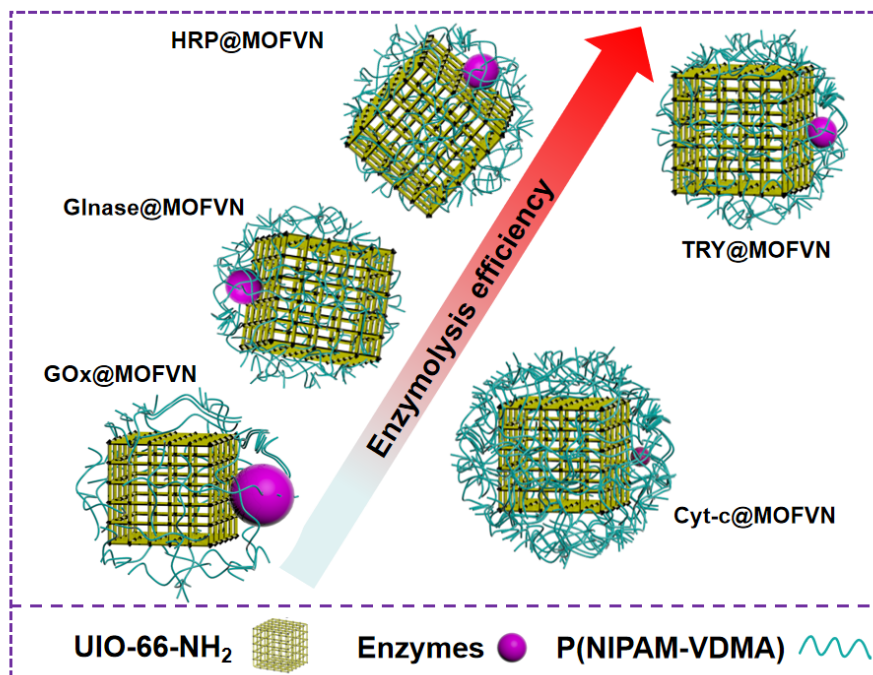

**Fig. S14.** Illustration of the nano-reactors enzymolysis efficiency affected by molecular weight of the immobilized enzymes.

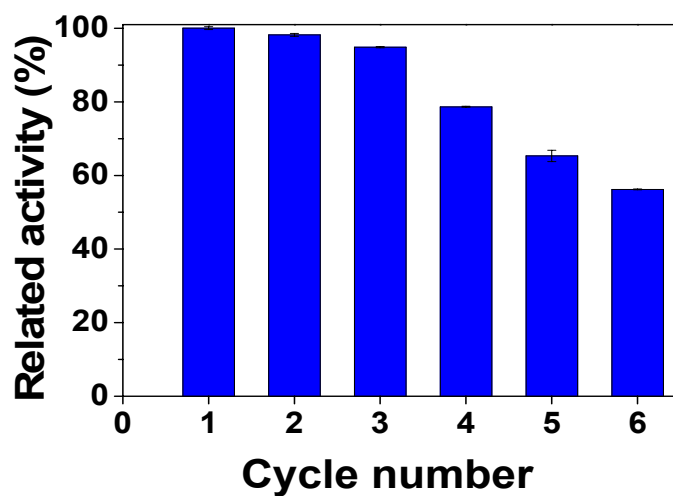

**Fig. S15.** Recyclability of HRP@MOFVN.

**Table S4** Recovery of the proposed method\*

| Serums | Detected (mM) | Added (mM) | Found (mM) | Recovery (%) | RSD (%) |
|--------|---------------|------------|------------|--------------|---------|
| 1      | 6.19          | 30.0       | 39.20      | 110.01       | 2.35    |
|        |               | 60.0       | 64.07      | 96.46        | 0.99    |
|        |               | 90.0       | 99.54      | 103.72       | 1.64    |
| 2      | 6.16          | 30.0       | 39.58      | 111.41       | 1.18    |
|        |               | 60.0       | 63.38      | 95.38        | 1.59    |
|        |               | 90.0       | 110.22     | 115.63       | 1.68    |
| 3      | 6.64          | 30.0       | 39.92      | 110.96       | 0.47    |
|        |               | 60.0       | 65.91      | 98.78        | 0.50    |
|        |               | 90.0       | 101.93     | 105.88       | 1.67    |

\*Blank controlled rat serums were used for recovery study (n=3).

## References

- [1] G. S. Chen, S. M. Huang, X. X. Kou, F. Zhu, G. F. Ouyang, Modulating the biofunctionality of metal-organic framework encapsulated enzymes through controllable embedding patterns. *Angew. Chem. Int. Ed.* 2020, **59**, 2867-2874.
- [2] G. S. Chen, S. M. Huang, X. X. Kou, F. Zhu, G. F. Ouyang, Embedding functional biomacromolecules within peptide-directed metal-organic framework (MOF) nanoarchitectures enables activity enhancement. *Angew. Chem. Int. Ed.* 2020, **59**, 13947-13954.
- [3] G. S. Chen, S. M. Huang, X. X. Kou, S. B. Wei, S. Y. Huang, S. Q. Jiang, J. Shen, F. Zhu, G. F. Ouyang, A Convenient and versatile amino-acid-boosted biomimetic strategy for the nondestructive encapsulation of biomacromolecules within metal-organic frameworks. *Angew. Chem. Int. Ed.* 2019, **58**, 1463-1467.
- [4] F. Lyu, Y. Zhang, R. N. Zare, J. Ge, Z. Liu, One-pot synthesis of protein-embedded metal-organic frameworks with enhanced biological activities. *Nano Lett.* 2014, **14**, 5761-5765.
- [5] F. K. Shieh, S. C. Wang, C. I. Yen, C. C. Wu, S. Dutta, L. Y. Chou, J. V. Morabito, P. Hu, M. H. Hsu, K. C. W. Wu, C. K. Tsung, Imparting functionality to biocatalysts via embedding enzymes into nanoporous materials by a de novo approach: Size-selective sheltering of catalase in metal-organic framework microcrystals. *J. Am. Chem. Soc.* 2015, **137**, 4276-4279.
- [6] Y. Zhang, F. Wang, E. Ju, Z. Liu, Z. Chen, J. Ren, X. Qu, Metal-organic-framework-based vaccine platforms for enhanced systemic immune and memory response. *Adv. Funct. Mater.* 2016, **26**, 6454-6461.
- [7] Y. Chen, V. Lykourinou, C. Vetromile, T. Hoang, L. J. Ming, R. W. Larsen, S. Ma, How can proteins enter the interior of a MOF? Investigation of cytochrome c translocation into a MOF consisting of mesoporous cages with microporous windows. *J. Am. Chem. Soc.* 2012, **134**, 13188-13191.
